# Supplementary figures and images for: miR-205 negatively regulates the androgen receptor and is associated with adverse outcome of prostate cancer patients
Source: PubMed Central journal article supplement — Br J Cancer. 2013 Apr 9;108(8):1668–76. doi: 10.1038/bjc.2013.131 (PMC3668465; doi:10.1038/bjc.2013.131), 2013-04-09

Supplementary figure 3

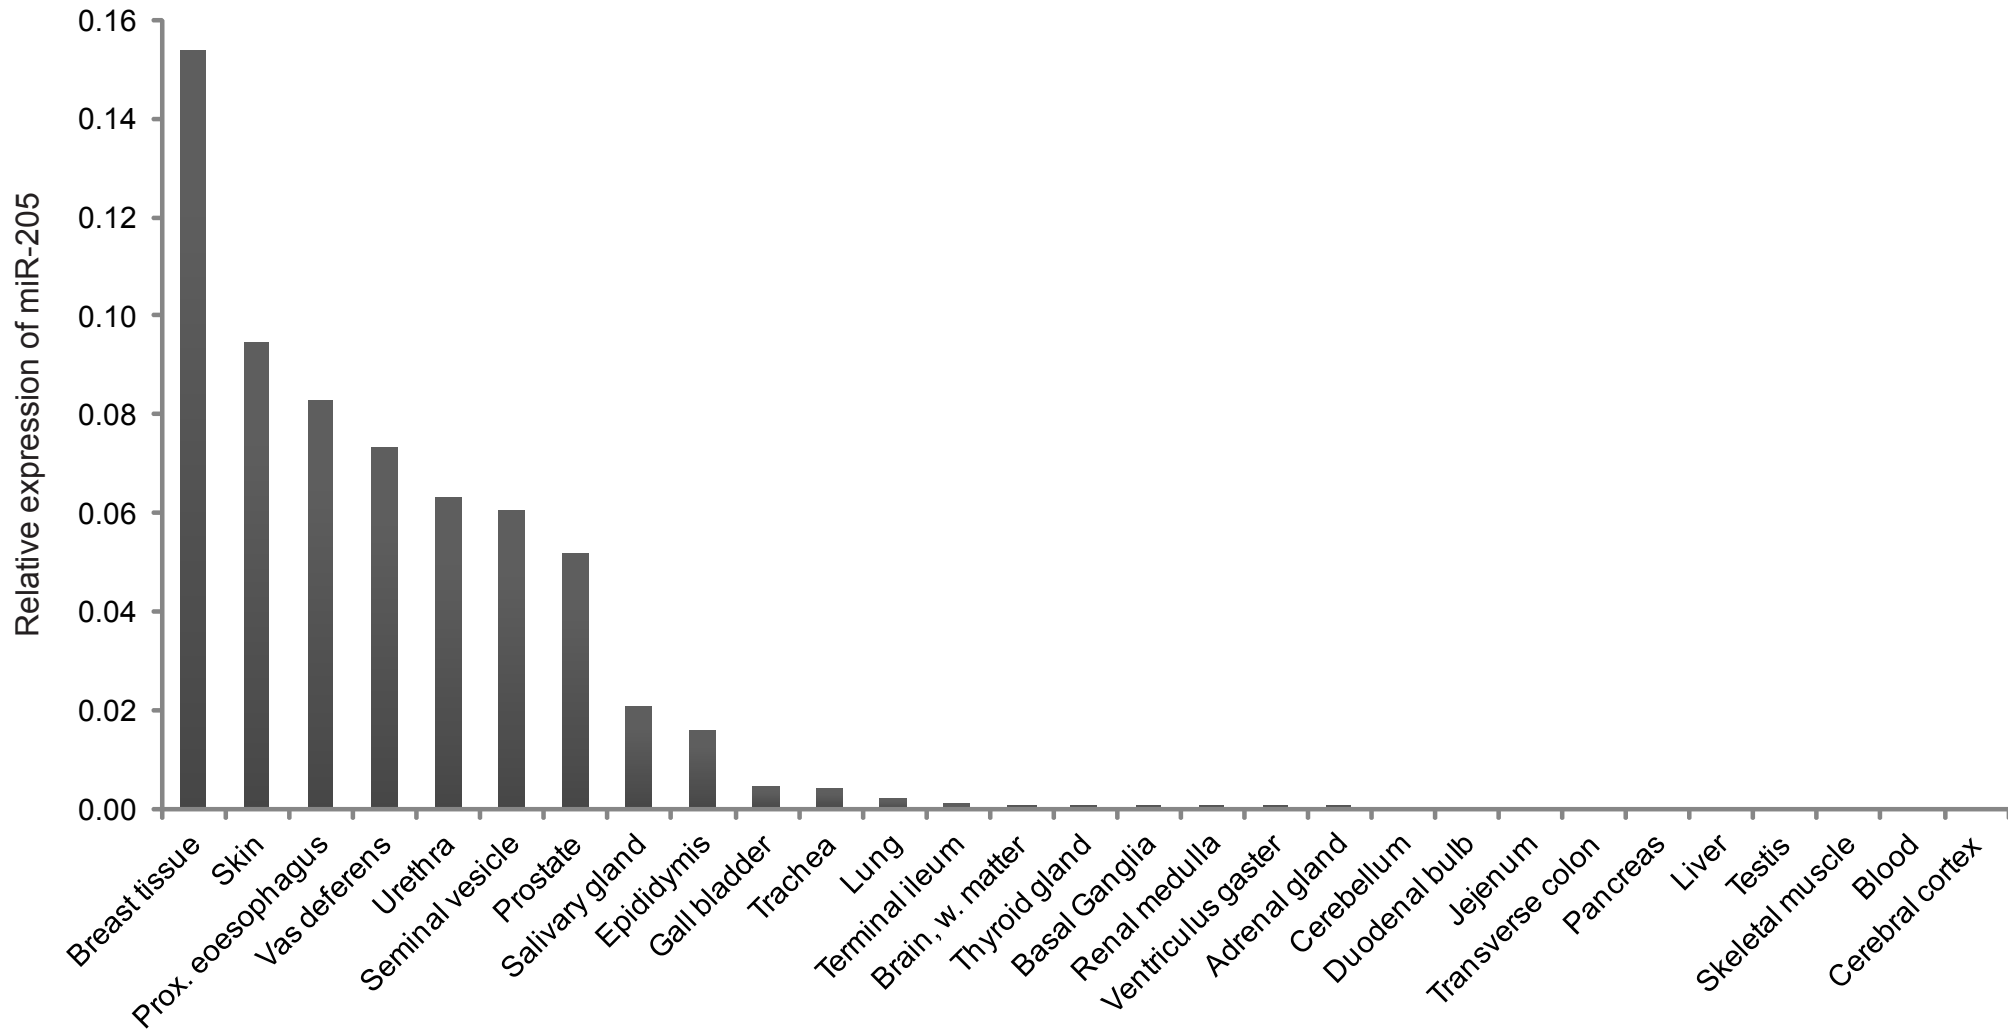

Supplement: bjc2013131x3.pdf [file bjc2013131x3.pdf]
